# Supplementary material
Source: MDPI journal article supplement (https://www.mdpi.com/2227-7390/11/5/1184)
Supplement: s1 [file s1 › Table S1.pdf]

# Estimating financial fraud through transaction-level features and machine learning

Ayed Alwadain <sup>1</sup>, Rao Faizan Ali <sup>2</sup>, Amgad Muneer <sup>3\*</sup>

<sup>1</sup>Computer Science Department, Community College, King Saud University, Riyadh 145111, Saudi Arabia

<sup>2</sup>Department of Software Engineering, School of Systems and Technology, University of Management and Technology, Lahore 54400, Pakistan

<sup>3</sup>Department of Imaging Physics, The University of Texas MD Anderson Cancer Center, Houston, TX, 77030, USA

\*Correspondence: muneeramgad@gmail.com;

**Table S1:** Detailed results of repeated 10-fold cross-validation for 15 repeats

| Fold       | Accuracy | ROC AUC | F1 Score |
|------------|----------|---------|----------|
| Repeat - 1 |          |         |          |
| 1          | 0.997    | 0.999   | 0.999    |
| 2          | 0.998    | 1.000   | 1.000    |
| 3          | 0.998    | 0.997   | 1.000    |
| 4          | 0.998    | 0.997   | 0.998    |
| 5          | 1.000    | 0.998   | 0.997    |
| 6          | 1.000    | 0.997   | 0.997    |
| 7          | 0.997    | 0.999   | 0.998    |
| 8          | 1.000    | 0.998   | 0.998    |
| 9          | 1.000    | 0.997   | 0.997    |
| 10         | 0.997    | 0.997   | 0.998    |
| Mean       | 0.999    | 0.998   | 0.998    |
| Repeat - 2 |          |         |          |
| 1          | 0.999    | 0.997   | 0.998    |
| 2          | 0.998    | 1.000   | 0.999    |
| 3          | 1.000    | 1.000   | 0.997    |
| 4          | 0.997    | 0.997   | 0.997    |
| 5          | 0.997    | 0.999   | 0.997    |
| 6          | 0.997    | 0.997   | 0.997    |
| 7          | 0.997    | 0.998   | 1.000    |
| 8          | 0.998    | 0.999   | 0.997    |
| 9          | 0.999    | 0.998   | 0.997    |
| 10         | 0.998    | 1.000   | 0.997    |
| Mean       | 0.998    | 0.999   | 0.998    |
| Repeat - 3 |          |         |          |

|            |       |       |       |
|------------|-------|-------|-------|
| 1          | 1.000 | 1.000 | 0.997 |
| 2          | 0.999 | 0.998 | 0.999 |
| 3          | 0.999 | 1.000 | 0.997 |
| 4          | 0.997 | 1.000 | 0.998 |
| 5          | 0.998 | 0.997 | 0.997 |
| 6          | 1.000 | 0.999 | 0.998 |
| 7          | 0.999 | 0.999 | 0.999 |
| 8          | 0.999 | 1.000 | 1.000 |
| 9          | 0.997 | 1.000 | 0.998 |
| 10         | 0.997 | 0.998 | 1.000 |
| Mean       | 0.999 | 0.999 | 0.998 |
| Repeat - 4 |       |       |       |
| 1          | 0.997 | 0.999 | 0.997 |
| 2          | 0.997 | 1.000 | 0.998 |
| 3          | 0.997 | 0.997 | 1.000 |
| 4          | 0.997 | 1.000 | 0.997 |
| 5          | 1.000 | 0.997 | 0.997 |
| 6          | 1.000 | 0.998 | 0.997 |
| 7          | 1.000 | 0.998 | 0.999 |
| 8          | 0.998 | 1.000 | 0.998 |
| 9          | 0.997 | 0.998 | 0.997 |
| 10         | 0.998 | 0.999 | 0.999 |
| Mean       | 0.998 | 0.999 | 0.998 |
| Repeat - 5 |       |       |       |
| 1          | 0.998 | 0.997 | 1.000 |
| 2          | 0.997 | 0.997 | 1.000 |
| 3          | 0.997 | 1.000 | 1.000 |
| 4          | 0.998 | 0.997 | 0.998 |
| 5          | 1.000 | 1.000 | 0.997 |
| 6          | 0.997 | 0.997 | 0.999 |
| 7          | 0.997 | 0.999 | 1.000 |
| 8          | 1.000 | 0.997 | 0.997 |
| 9          | 0.999 | 0.999 | 1.000 |
| 10         | 0.998 | 0.998 | 0.997 |
| Mean       | 0.998 | 0.998 | 0.999 |
| Repeat - 6 |       |       |       |
| 1          | 0.997 | 0.998 | 0.997 |
| 2          | 0.998 | 0.997 | 0.997 |
| 3          | 0.999 | 0.999 | 0.997 |
| 4          | 1.000 | 0.999 | 1.000 |
| 5          | 1.000 | 0.997 | 0.997 |
| 6          | 1.000 | 0.997 | 0.997 |
| 7          | 1.000 | 0.997 | 1.000 |
| 8          | 0.999 | 0.999 | 0.998 |
| 9          | 0.997 | 0.997 | 0.999 |

|             |       |       |       |
|-------------|-------|-------|-------|
| 10          | 0.997 | 0.998 | 0.999 |
| Mean        | 0.999 | 0.998 | 0.998 |
| Repeat - 7  |       |       |       |
| 1           | 1.000 | 1.000 | 1.000 |
| 2           | 0.998 | 0.997 | 1.000 |
| 3           | 0.999 | 0.997 | 0.997 |
| 4           | 1.000 | 1.000 | 1.000 |
| 5           | 0.997 | 0.998 | 0.998 |
| 6           | 0.999 | 0.999 | 0.998 |
| 7           | 1.000 | 0.997 | 0.998 |
| 8           | 0.998 | 0.997 | 0.997 |
| 9           | 0.997 | 0.997 | 0.997 |
| 10          | 0.997 | 0.997 | 0.999 |
| Mean        | 0.999 | 0.998 | 0.998 |
| Repeat - 8  |       |       |       |
| 1           | 0.998 | 0.997 | 0.999 |
| 2           | 0.997 | 1.000 | 0.997 |
| 3           | 1.000 | 0.997 | 0.998 |
| 4           | 0.999 | 0.999 | 0.997 |
| 5           | 1.000 | 0.998 | 1.000 |
| 6           | 1.000 | 0.997 | 1.000 |
| 7           | 1.000 | 0.997 | 0.998 |
| 8           | 0.997 | 1.000 | 0.997 |
| 9           | 1.000 | 1.000 | 0.997 |
| 10          | 0.997 | 0.997 | 0.998 |
| Mean        | 0.999 | 0.998 | 0.998 |
| Repeat - 9  |       |       |       |
| 1           | 1.000 | 0.997 | 0.998 |
| 2           | 0.999 | 0.997 | 1.000 |
| 3           | 1.000 | 0.999 | 1.000 |
| 4           | 1.000 | 0.997 | 1.000 |
| 5           | 0.997 | 0.997 | 0.998 |
| 6           | 0.997 | 0.997 | 1.000 |
| 7           | 1.000 | 0.999 | 0.999 |
| 8           | 0.999 | 0.998 | 0.997 |
| 9           | 1.000 | 0.997 | 0.999 |
| 10          | 0.998 | 1.000 | 0.997 |
| Mean        | 0.999 | 0.998 | 0.999 |
| Repeat - 10 |       |       |       |
| 1           | 0.997 | 0.997 | 0.997 |
| 2           | 0.997 | 0.997 | 0.999 |
| 3           | 1.000 | 0.998 | 0.998 |
| 4           | 0.997 | 0.999 | 0.997 |
| 5           | 1.000 | 0.999 | 0.999 |
| 6           | 1.000 | 0.997 | 0.999 |

|             |       |       |       |
|-------------|-------|-------|-------|
| 7           | 0.999 | 0.999 | 1.000 |
| 8           | 1.000 | 0.999 | 0.999 |
| 9           | 1.000 | 1.000 | 0.998 |
| 10          | 0.997 | 1.000 | 0.999 |
| Mean        | 0.999 | 0.999 | 0.999 |
| Repeat - 11 |       |       |       |
| 1           | 0.997 | 0.997 | 1.000 |
| 2           | 0.998 | 0.999 | 0.998 |
| 3           | 0.997 | 1.000 | 0.997 |
| 4           | 0.997 | 0.999 | 0.998 |
| 5           | 1.000 | 0.998 | 0.997 |
| 6           | 0.999 | 1.000 | 1.000 |
| 7           | 0.999 | 0.997 | 0.998 |
| 8           | 0.997 | 0.999 | 0.998 |
| 9           | 0.997 | 0.998 | 0.997 |
| 10          | 0.998 | 0.999 | 0.998 |
| Mean        | 0.998 | 0.999 | 0.998 |
| Repeat - 12 |       |       |       |
| 1           | 0.999 | 0.997 | 0.999 |
| 2           | 0.998 | 1.000 | 0.998 |
| 3           | 1.000 | 0.997 | 0.997 |
| 4           | 0.997 | 1.000 | 1.000 |
| 5           | 0.998 | 0.998 | 0.997 |
| 6           | 0.998 | 0.998 | 0.997 |
| 7           | 0.997 | 0.997 | 0.997 |
| 8           | 0.999 | 0.997 | 0.998 |
| 9           | 0.997 | 1.000 | 0.997 |
| 10          | 1.000 | 0.997 | 1.000 |
| Mean        | 0.998 | 0.998 | 0.998 |
| Repeat - 13 |       |       |       |
| 1           | 0.998 | 0.997 | 0.998 |
| 2           | 0.998 | 0.998 | 0.997 |
| 3           | 0.998 | 0.997 | 1.000 |
| 4           | 0.997 | 0.997 | 1.000 |
| 5           | 0.997 | 0.997 | 0.997 |
| 6           | 0.997 | 0.997 | 0.999 |
| 7           | 0.997 | 0.999 | 1.000 |
| 8           | 0.997 | 0.997 | 1.000 |
| 9           | 0.997 | 0.998 | 0.997 |
| 10          | 0.997 | 0.999 | 0.998 |
| Mean        | 0.997 | 0.998 | 0.999 |
| Repeat - 14 |       |       |       |
| 1           | 1.000 | 0.997 | 0.997 |
| 2           | 0.998 | 0.997 | 0.997 |
| 3           | 0.999 | 0.998 | 0.997 |

|             |       |       |       |
|-------------|-------|-------|-------|
| 4           | 0.999 | 0.999 | 0.999 |
| 5           | 0.997 | 0.997 | 1.000 |
| 6           | 0.997 | 0.998 | 0.997 |
| 7           | 0.999 | 0.997 | 0.999 |
| 8           | 0.997 | 1.000 | 0.998 |
| 9           | 0.997 | 1.000 | 0.997 |
| 10          | 0.997 | 0.997 | 0.997 |
| Mean        | 0.998 | 0.998 | 0.998 |
| Repeat - 15 |       |       |       |
| 1           | 0.997 | 0.997 | 0.997 |
| 2           | 0.997 | 0.998 | 0.998 |
| 3           | 0.997 | 0.998 | 0.997 |
| 4           | 0.999 | 0.997 | 0.998 |
| 5           | 1.000 | 0.999 | 0.997 |
| 6           | 0.997 | 0.999 | 1.000 |
| 7           | 0.997 | 0.999 | 0.998 |
| 8           | 0.999 | 0.998 | 1.000 |
| 9           | 0.997 | 0.998 | 0.998 |
| 10          | 0.998 | 0.997 | 1.000 |
| Mean        | 0.998 | 0.998 | 0.998 |
